# Supplementary material for: Effects of high altitude and cold air exposure on airway inflammation in patients with asthma
Source: HighWire-hosted journal article supplement (doi:10.1136/thoraxjnl-2013-203280), 2013-07-02
Supplement: thoraxjnl-2013-203280supp.pdf [file thoraxjnl-2013-203280supp.pdf]

1 **Online depository**

2 *Subjects*

3 Potential candidates were non-smokers who were referred by their treating physicians  
4 on the basis of a previous diagnosis of asthma (of at least 1 year) requiring treatment,  
5 adequate compliance with the treatment (as assessed by physician), stable asthma  
6 control and willingness to participate to this expedition. Final selection was done by 2  
7 pulmonologists (MD & LD) after review of clinical records, asthma control scores  
8 and test results. Approval was obtained from the local ethical committee of the UZ  
9 Leuven and patients gave informed consent.

10 *Hypoxic exercise test*

11 A hypoxic exercise test was performed in a hypoxic facility at KU Leuven  
12 (SportingEdge UK, Sherfield on Loddon, UK). Participants were exposed to  
13 normobaric (760 mm Hg) hypoxia ( $FiO_2 = 11\%$ ), which corresponds to  $pO_2$  existing  
14 at ~5200 m altitude. They entered the room and remained seated on a chair for 30  
15 min. After 30 min of rest, patients performed an incremental maximal exercise test on  
16 a treadmill in the altitude chamber. They started at a speed of 6 km/hour for 10 min  
17 followed by a 1 km/hour increase every 3 min until exhaustion. Patients were  
18 continuously monitored at rest for 30 minutes and during exercise ( $O_2$  saturation,  
19 heart rate, ECG). FeNO and spirometry were measured and venous blood samples  
20 were obtained.

21 *24-hour exposure to cold air*

22 Patients stayed for 24 hours in an indoor ski area (SnowWorld, Landgraaf, the  
23 Netherlands). Walking exercises and equipment training were performed in  
24 preparation to the high altitude expedition, and patients also spent the night in the

25 indoor ski area. During this 24-hour period, daytime temperature was kept at  $-5^{\circ}\text{C}$  and  
26 night time temperature at  $-8^{\circ}\text{C}$ . In order to evaluate the effects of cold exposure  
27 FeNO, spirometry and induced sputum were analyzed before and immediately after  
28 the time spent in the indoor ski area. In addition, spirometry was also performed after  
29 12 hours inside the indoor ski area.

### 30 *Expedition*

31 During the expedition the patients were exposed to a progressively increasing altitude:  
32 750 m at the start of the expedition (Mendoza, Argentina), 2600 m (Los Penitentes),  
33 3400 m (Camp Confluenzia), 4300 (Basecamp Plaza de Mulas), 5000m (Camp  
34 Canada), 5600m (Camp Nido de Condores) and 5963 m (Camp Colera, final high  
35 altitude camp before the top of the Aconcagua mountain at 6959 m). In addition,  
36 during the 3 weeks of the expedition, the group made several high altitude trekkings.  
37 The altitude profile is shown in Figure 1. Baseline measurements were carried out 5  
38 days before departure in Leuven, Belgium (sputum induction, venous blood sample)  
39 and in Mendoza at the start of the expedition (FeNO, spirometry, heart rate, blood  
40 pressure,  $\text{O}_2$  saturation, clinical examination). All measurements were repeated 72  
41 hours after the ascent in Brussels, Belgium. During the expedition at the different  
42 altitude levels, patients reported symptoms of acute mountain sickness by means of  
43 the Lake Louise self-report questionnaire, scoring symptoms of headache gastro-  
44 intestinal symptoms, fatigue, dizziness and sleep disturbance on a 3-point scale.  
45 Peripheral  $\text{O}_2$  saturation and heart rate were measured as well as daily asthma  
46 symptoms (on a 5-point scale in which a score of 0 represented no asthma-related  
47 symptoms and a score of 4 represented the highest discomfort) and use of asthma  
48 rescue medication. FeNO and spirometry were measured at the different altitude  
49 levels and compared to baseline values at 750 m. PeNO (partial pressure of NO in

50 exhaled gas) values were calculated as described previously by multiplying FeNO  
51 values by ambient pressure minus water vapor pressure at 37°C.

52 None of the patients were treated with acetazolamide or any medication to prevent  
53 symptoms of high altitude sickness. Asthma treatment remained unchanged during at  
54 least 3 months before departure as well as during the expedition. Salbutamol DPI was  
55 provided as rescue treatment, instead of salbutamol MDI at altitudes >3400m.

## 56 *Measurements*

### 57 Lung function

58 Spirometry and bronchial challenge test was performed according to ATS/ERS  
59 guidelines in the pulmonary function lab of the university hospital Gasthuisberg.  
60 Measurement of the fraction of exhaled nitric oxide (FeNO) was performed at a flow  
61 rate of 50 ml/s with a chemoluminescence analyser (NIOX Flex, Aerocrine, Sweden).

### 62 Sputum induction, processing and analysis

63 Sputum induction and processing was performed as described previously. Sputum  
64 total and differential cell counts were obtained by cytopsin (Shandon cytocentrifuge,  
65 Block Scientific). Cytokine mRNA levels (IL-4, IL-5, IL-17A and IFN- $\gamma$ ) were  
66 measured by real-time (RT)-PCR. Sputum MPO and VEGF-A levels were measured  
67 by Enzyme Linked Immunosorbent Assay (ELISA) according to the manufacturers'  
68 protocol (Hycult biotech and R&D Systems).

### 69 Serum analysis

70 Serum samples were analyzed for high-sensitive CRP,  $\alpha$ 1-antitrypsin, complement  
71 factor 3 and total IgE (ImmunoCAP, Phadia) as detailed in Figure 1. Serum Clara cell

72 protein 16 was analyzed by ELISA according to the manufacturers' protocol  
73 (Biovendor).

74 Spirometry, FeNO, Oxygen saturation and heart rate during the expedition

75 During the expedition, spirometry was performed using a Microloop turbine  
76 spirometer (Micro Medical, UK). This spirometer has been shown not to be affected  
77 by altitude, temperature changes and humidity (Pedersen, Miller, Sigsgaard et al. ERJ  
78 1994 and Pollard, Mason, Barry et al. Thorax 1996) and has been used in a previous  
79 high altitude study (Huismans, Douma, Kerstjens et al. J of Asthma 2010). Absolute  
80 measurements of FVC & FEV<sub>1</sub> were recorded from 2 to 3 maximal expiratory flow  
81 volume curves, the best values were used for analysis. FeNO was measured using the  
82 NObreath analyser (Bedfont Scientific Ltd), before the spirometry. Peripheral O<sub>2</sub>  
83 saturation and heart rate were recorded with a Nonin Onyx 9500 fingertip pulse  
84 oximeter at the warm index of the middle finger.

85 All measurements during the expedition were performed by the same 2  
86 pulmonologists (MD & LD) between 3 and 7 pm after at least 10 min of rest while the  
87 subject was seated in a tent.
